# Supplementary material for: Molecular and Histological Profiling Reveals an Innate-Shaped Immune Microenvironment in Solitary Juvenile Polyps
Source: PubMed Central journal article supplement — Clin Transl Gastroenterol. 2021 Jun 1;12(6):e00361. doi: 10.14309/ctg.0000000000000361 (PMC8162518; doi:10.14309/ctg.0000000000000361), 2021-06-01
Supplement: ct9-12-e00361-s001.pdf [file ct9-12-e00361-s001.pdf]

Supplementary Figure 1

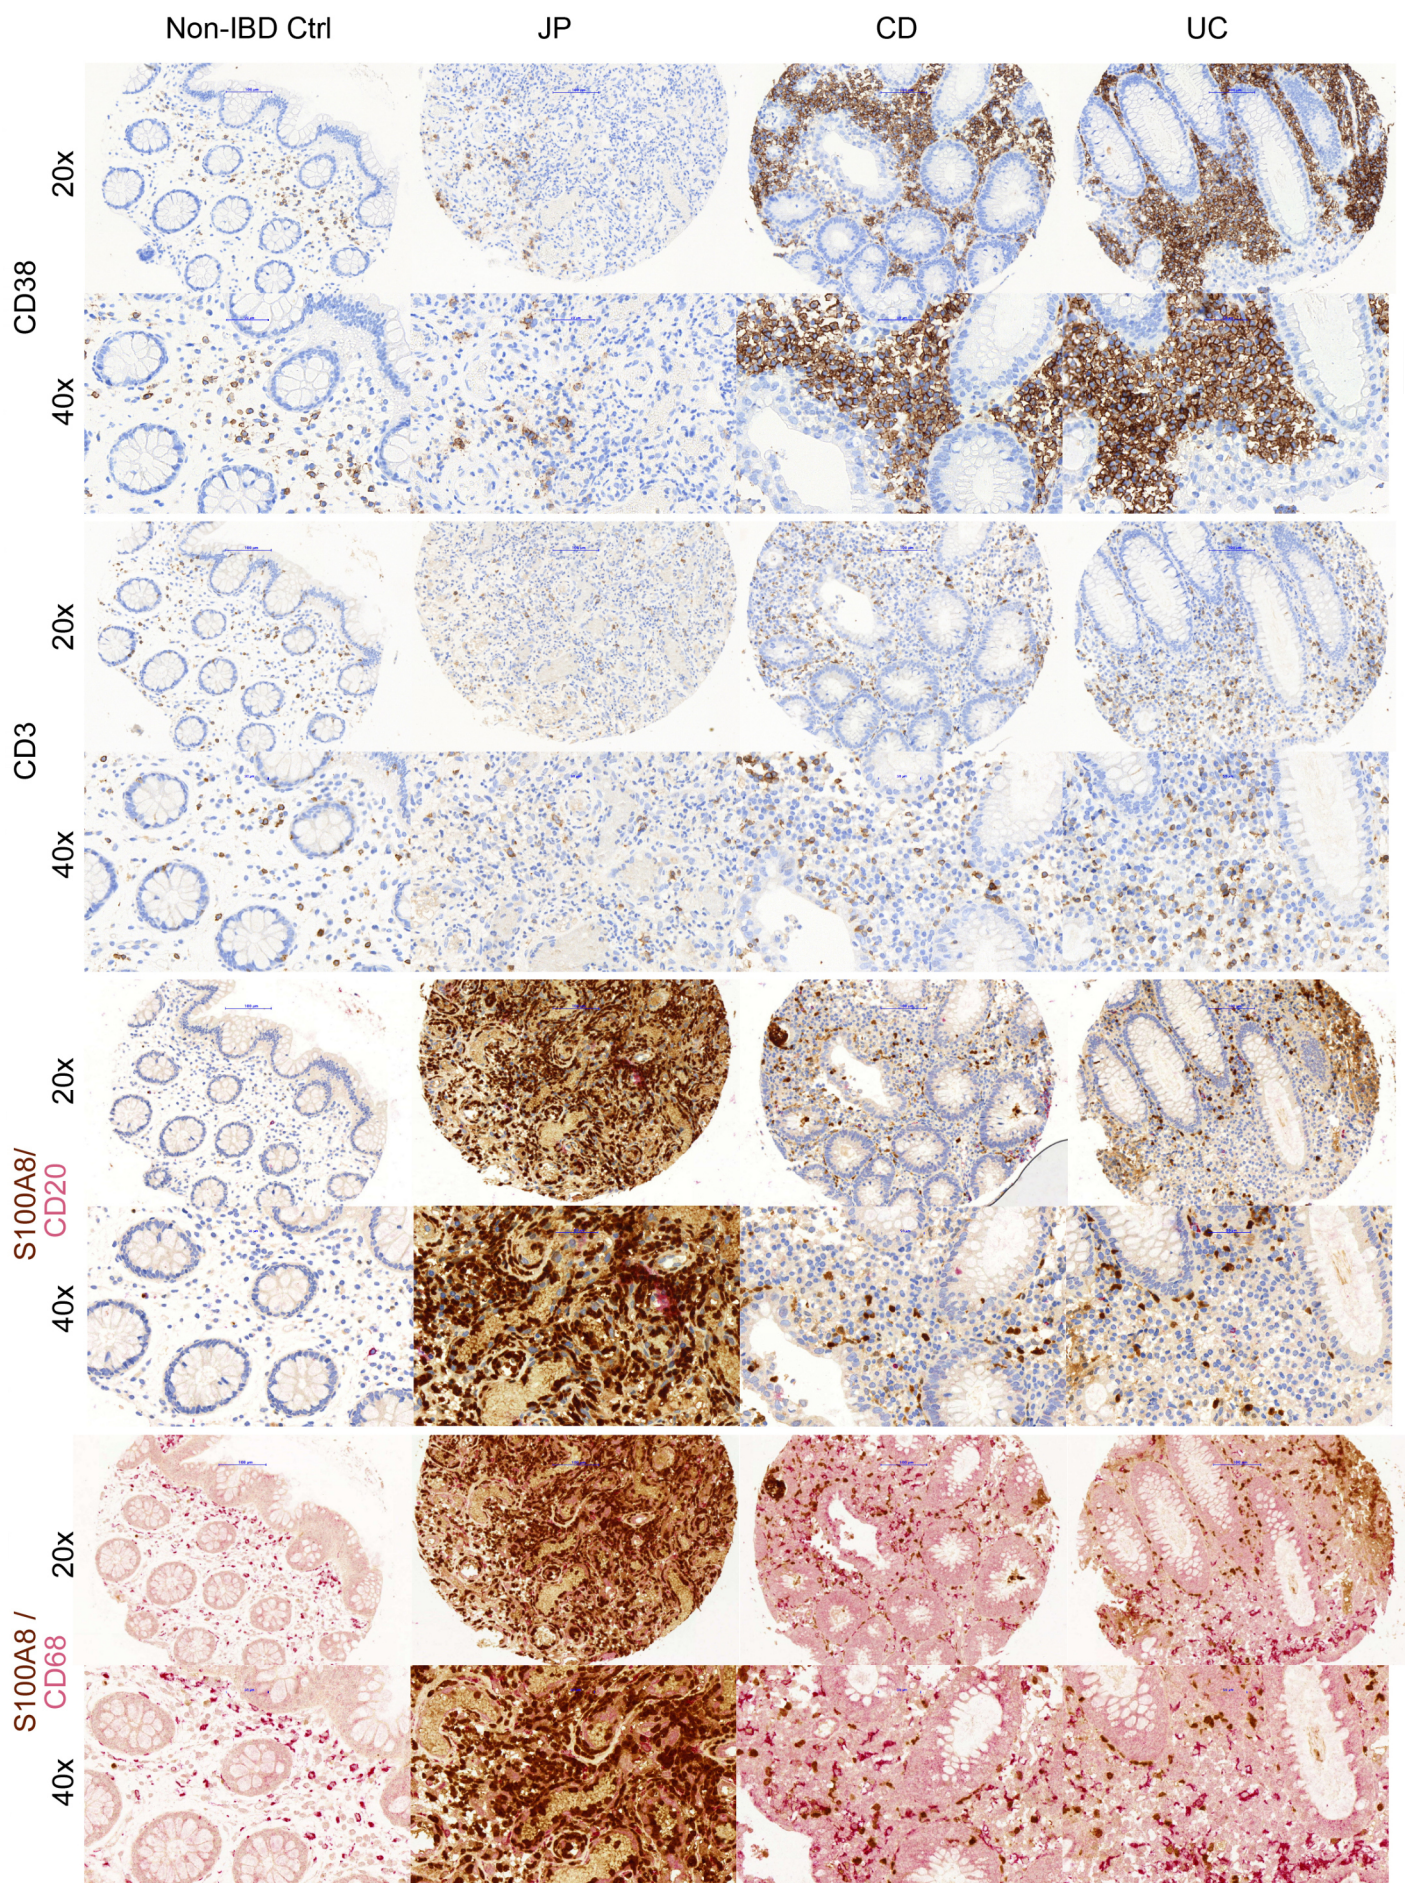

Legend: Representative images of immunohistochemistry stainings. CD38 for plasma cells, CD3 for T-cells, CD20 for B-cells with co-staining for calprotectin (S100A8), and CD68 for macrophages with co-staining for calprotectin. non-IBD Controls (non-IBD Ctrl), solitary juvenile polyp (JP), Crohn's disease (CD), and ulcerative colitis (UC).
