# Supplementary material for: Molecular and Histological Profiling Reveals an Innate-Shaped Immune Microenvironment in Solitary Juvenile Polyps
Source: PubMed Central journal article supplement — Clin Transl Gastroenterol. 2021 Jun 1;12(6):e00361. doi: 10.14309/ctg.0000000000000361 (PMC8162518; doi:10.14309/ctg.0000000000000361), 2021-06-01
Supplement: ct9-12-e00361-s002.pdf [file ct9-12-e00361-s002.pdf]

Supplementary Figure 2

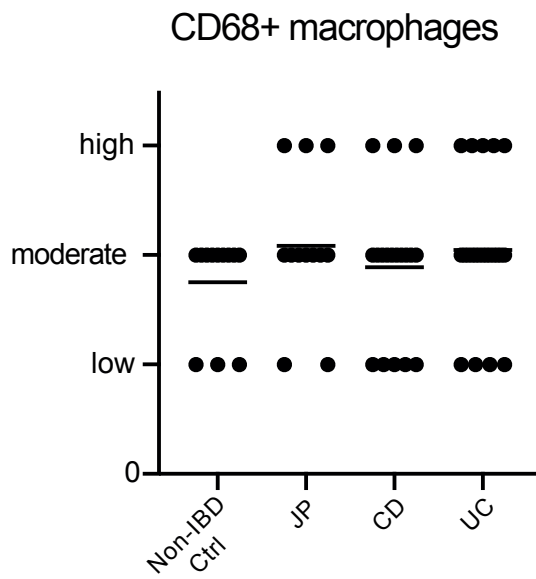

Legend: Relative frequency of infiltrating macrophages (CD68+) of the indicated groups. Symbols indicate individual patient samples and bars indicate mean.
