# Supplementary material for: Molecular and Histological Profiling Reveals an Innate-Shaped Immune Microenvironment in Solitary Juvenile Polyps
Source: PubMed Central journal article supplement — Clin Transl Gastroenterol. 2021 Jun 1;12(6):e00361. doi: 10.14309/ctg.0000000000000361 (PMC8162518; doi:10.14309/ctg.0000000000000361), 2021-06-01
Supplement: ct9-12-e00361-s003.pdf [file ct9-12-e00361-s003.pdf]

Supplementary Figure 3

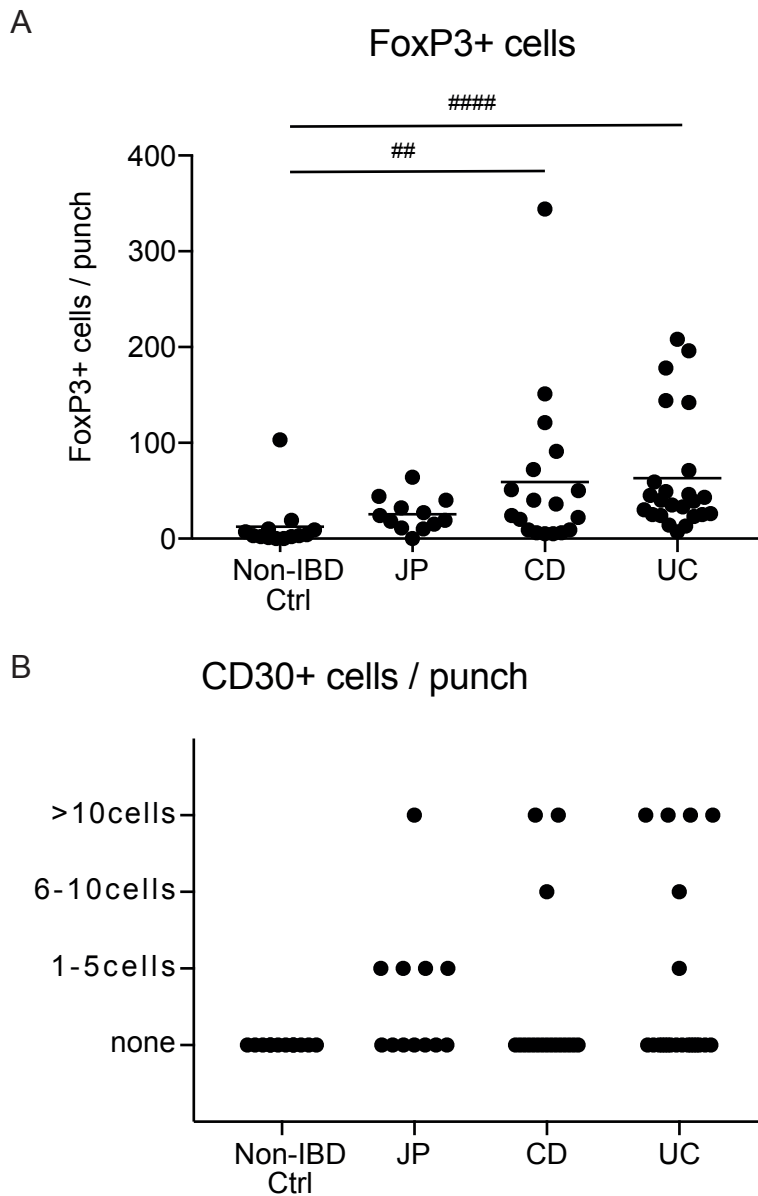

**Legend:**

Absolute number of Foxp3+ cells A) and CD30+ cells B) per punch of the indicated groups. Symbols represent individual patient samples and bars indicate mean. For B) absolute cell numbers were divided into classes according the axis label. ## p<0.01 and #### p<0.0001 as determined by the Kruskal Wallis test. No indication means p>0.05 and is considered as not significant.
