# Supplementary material for: Molecular and Histological Profiling Reveals an Innate-Shaped Immune Microenvironment in Solitary Juvenile Polyps
Source: PubMed Central journal article supplement — Clin Transl Gastroenterol. 2021 Jun 1;12(6):e00361. doi: 10.14309/ctg.0000000000000361 (PMC8162518; doi:10.14309/ctg.0000000000000361), 2021-06-01
Supplement: ct9-12-e00361-s005.pdf [file ct9-12-e00361-s005.pdf]

**Supplementary Table 1** Immunohistochemical staining of ngTMA: list of primary antibodies used.

| <b>Antibody</b> | <b>Clone</b> | <b>Host</b> | <b>Clonality</b> | <b>Company</b>   | <b>Reference</b> | <b>Dilution</b> |
|-----------------|--------------|-------------|------------------|------------------|------------------|-----------------|
| MMP-9           | 2CS          | Mouse       | monoclonal       | Santa Cruz       | sc21733          | 1:250           |
| S100A8          | CF-145       | Mouse       | monoclonal       | Novus biological | NBP1-02826       | 1:6000          |
| CD3             | SP7          | Rabbit      | monoclonal       | Abcam            | ab16669          | 1:400           |
| CD4             |              | Mouse       | monoclonal       | Novocastra       | NCL-368          | 1:100           |
| CD38            |              | Mouse       | monoclonal       | Novocastra       | NCL-290          | 1:200           |
| CD20            | L26          | Mouse       | monoclonal       | DAKO             | IM0755           | 1:800           |
| FOXP3           | 236A/E7      | Mouse       | monoclonal       | Abcam            | ab20034          | 1:100           |
| CD68            | KP1          | Mouse       | monoclonal       | Dako             | M0814            | 1:4000          |
| MPO             |              | Rabbit      | polyclonal       | Dako             | AO3978           | 1:5000          |
| CD30            | JCM182       | Mouse       | monoclonal       | Novocastra       | NCL-591          | 1:100           |

**Supplementary Table 2** Gene list nanostring analysis.

| <b>gene name</b> | <b>accession</b> | <b>full name</b>                                                                                   |
|------------------|------------------|----------------------------------------------------------------------------------------------------|
| RPL19            | NM_00981.3       | Homo Sapiens ribosomal protein L19 mRNA                                                            |
| TUBB             | NM_178014.2      | Homo sapiens Tubulin beta mRNA                                                                     |
| ABCF1            | NM_001090.2      | Homo sapiens ATB-binding cassette sub-family F member 1, transcript variant 2 mRNA                 |
| ALAS1            | NM_000688.4      | Homo sapiens aminolevulinate delta- synthase 1 transcript variant 1 mRNA                           |
| S100A9           | NM_002965.2      | S100 calcium binding protein A9 (calprotectin)                                                     |
| S100A8           | NM_002964.3      | S100 calcium binding protein A8 (calprotectin)                                                     |
| CXCL8            | NM_000584.2      | Interleukin 8                                                                                      |
| CSF3             | NM_000759.3      | Colony stimulating factor 3 (granulocyte)                                                          |
| MPO              | NM_000250.1      | Myeloperoxidase                                                                                    |
| CXCL5            | NM_002994.3      | Epithelial derived neutrophil-activating peptide 78 (ENA-78)                                       |
| MCL1             | NM_182763.1      | Myeloid cell leukemia sequence (BCL2 family -> depending on splice variant pro- vs anti-apoptotic) |
| BCL2A1           | NM_004049.2      | BCL2 related protein A1 (BFL1) pro-survival                                                        |
| EPCAM            | NM_002354.1      | Epithelial adhesion molecule                                                                       |
| ICAM-1           | NM_000201.1      | Intercellular adhesion molecule                                                                    |
| MMP9             | NM_004994.2      | Matrix metalloproteinase 9                                                                         |
| VEGFa            | NM_001025370.1   | Vascular endothelial growth factor A                                                               |
| PTPRC            | NM_080923.2      | Protein tyrosine phosphatase receptor Type C (CD45)                                                |
| TNF              | NM_000594.2      | Tumor necrosis factor                                                                              |
| IL33             | NM_033439.2      | Interleukin 33                                                                                     |
| IL18             | NM_001562.2      | Interleukin 18                                                                                     |
| IFNG             | NM_000619.2      | Interferon gamma                                                                                   |
| IL17A            | NM_002190.2      | Interleukin 17 A                                                                                   |
| IL12A            | NM_000882.2      | Interleukin 12 p35                                                                                 |
| IL22             | NM_020525.4      | Interleukin 22                                                                                     |
| IL23A            | NM_016584.2      | Interleukin 23 subunit p19                                                                         |
| IL17F            | NM_052872.3      | Interleukin 17 F                                                                                   |

|        |                |                                                                  |
|--------|----------------|------------------------------------------------------------------|
| IL1B   | NM_000576.2    | Interleukin 1 beta                                               |
| CCL11  | NM_002986.2    | Eotaxin 1                                                        |
| CCL24  | NM_002991.2    | Eotaxin 2                                                        |
| CCR3   | NM_001837.2    | Chemokine (C-C motif) receptor 3                                 |
| IL5    | NM_000879.2    | Interleukin 5 (colony stimulating factor eosinophil)             |
| EPX    | NM_000502.4    | Eosinophil peroxidase                                            |
| TBX21  | NM_013351.1    | T-box 21 (T-bet) Th1 cells                                       |
| GATA3  | NM_001002295.1 | GATA binding protein 3 Th2 cells                                 |
| RORC   | NM_001001523.1 | RAR-related orphan receptor C isoform 2 (ROR gamma t) Th17 cells |
| FOXP3  | NM_001114377.1 | Forkhead box P3 Tregs                                            |
| CXCL10 | NM_001565.1    | Interferon gamma-induced protein 10 (IP-10)                      |
| CD68   | NM_001251.2    | CD68 molecule                                                    |
| CCL2   | NM_002982.3    | Monocyte chemoattractant protein 1 (MCP1)                        |
| CCR2   | NM_001123041.2 | Chemokine (c-c motif) receptor 2                                 |
| TREM1  | NM_018643.3    | Triggering receptor expressed on myeloid cells 1                 |
| TREM2  | NM_018965.3    | Triggering receptor expressed on myeloid cells 2                 |
| CSF2   | NM_000758.2    | Colony stimulating factor 2 (granulocyte / monocyte)             |
| ATG5   | NM_004849.2    | Autophagy related gene 5                                         |
